# Supplementary material
Source: PubMed Central journal article supplement (PMC4836978)
Supplement: NIHMS773329-supplement-Supplemental_Tables.pdf [file NIHMS773329-supplement-Supplemental_Tables.pdf]

| <b>Supplemental Table 1: Abstracts Reporting Crude Interictal Total Adiponectin Levels (ug/mL) in Those with Migraine Versus Controls</b>             |                       |            |                   |                 |                 |                            |                |
|-------------------------------------------------------------------------------------------------------------------------------------------------------|-----------------------|------------|-------------------|-----------------|-----------------|----------------------------|----------------|
| <b>Author &amp; Year (Journal)</b>                                                                                                                    | <b>N</b>              | <b>Age</b> | <b>Sex</b>        | <b>Controls</b> | <b>Migraine</b> | <b>Direction of Change</b> | <b>p-value</b> |
| Tietjen 2010 (Headache Abstract)                                                                                                                      | 175 (125 Mig, 50 Con) | 18-50      | W                 | 25.2 ± NR*      | 25.6 ± NR*      | -                          | >0.05          |
| Toprak & Ure (Neurology Abstract)                                                                                                                     | 134 (70 Mig, 60 Con)  | 18-50      | W & M<br>Combined | NR              | NR              | ↑                          | .01            |
|                                                                                                                                                       |                       |            | Women Alone       | NR              | NR              | ↑                          | <0.05          |
| Note: Adiponectin levels have been rounded to nearest 0.1 ug/mL. *Levels are age adj. Con=controls; Mig=migraine; NR=not reported; ns=not significant |                       |            |                   |                 |                 |                            |                |

**Supplemental Table 2: Summary of Bernecker et al. Studies Utilizing Overlapping Cohorts Reporting Crude Adiponectin & Leptin Levels in Those with Migraine Versus Controls**

| Author & Year                                        | N                    | Sex                                                     | Controls       | Migraine      | Direction of Change | p-value |
|------------------------------------------------------|----------------------|---------------------------------------------------------|----------------|---------------|---------------------|---------|
| <b>Crude Leptin Levels (ng/mL)</b>                   |                      |                                                         |                |               |                     |         |
| <b>Summary from Ref 29-31</b>                        | 132 (58 Mig, 74 Con) | W: 47 Mig, 47 Con                                       | W: 10.5 ± 6    | W: 16.7 ± 10  | ↑↑                  | 0.002   |
|                                                      |                      | M: 11 Mig, 27 Con                                       | M: 6.3 ± 7     | M: 4.9 ± 4.4  | -                   | >0.05   |
| Bernecker 2010 (C) <sup>29Δ</sup>                    | 84 (40 Mig, 44 Con)  | W only                                                  | 10 ± 6         | 15 ± 10       | ↑↑                  | <0.01   |
| Bernecker 2011 (EJN Vol 18 page 571) <sup>30Δ</sup>  | 124 (50 Mig, 74 Con) | W & M Combined<br>W: 42 Mig, 46 Con<br>M: 8 Mig, 28 Con | 10 ± 12        | 14 ± 11       | -                   | >0.05   |
| Bernecker 2011 (EJN Vol 18 page 1233) <sup>31Δ</sup> | 96 (48 Mig, 48 Con)  | W Only                                                  | 13 ± 13        | 18 ± 15       | -                   | >0.05   |
| <b>Crude ADP Levels (ug/mL)</b>                      |                      |                                                         |                |               |                     |         |
| <b>Summary from Ref 29-31</b>                        | 131 (58 Mig, 73 Con) | W: 47 Mig, 46 Con                                       | W: 18.4 ± 11.2 | W: 16.2 ± 7.5 | -                   | >0.05   |
|                                                      |                      | M: 11 Mig, 27 Con                                       | M: 12.3 ± 5.7  | M: 11.5 ± 7.0 | -                   | >0.05   |
| Bernecker 2010 (C) <sup>Δ</sup>                      | 84 (40 Mig, 44 Con)  | W only                                                  | 18.8 ± 11.3    | 17.0 ± 7.5    |                     | >0.05   |
| Bernecker 2011 (EJN Vol 18 page 571) <sup>Δ</sup>    | 124 (50 Mig, 74 Con) | W & M Combined<br>W: 42 Mig, 46 Con<br>M: 8 Mig, 28 Con | 16.2 ± 10      | 16.6 ± 7.4    | -                   | >0.05   |
| Bernecker 2011 (EJN Vol 18 page 1233) <sup>Δ</sup>   | 96 (48 Mig, 48 Con)  | W Only                                                  | 18.3±11.2      | 16.1 ± 7.6    | -                   | >0.05   |

Note: Table shows unpublished data summarizing leptin and adiponectin levels from all unique individuals from the Bernecker et al studies published using overlapping cohorts<sup>Δ</sup> and that include crude adipokine levels. Leptin levels have been round to nearest 1 ng/mL. Adiponectin levels have been rounded to nearest 1.0 ug/mL. C=Cephalalgia; EJN=European Journal of Neurology
